# Supplementary material for: Mathematical Modeling of Hepatitis C Prevalence Reduction with Antiviral Treatment Scale-Up in Persons Who Inject Drugs in Metropolitan Chicago
Source: PubMed Central journal article supplement (PMC4546683; doi:10.1371/journal.pone.0135901), 2015-08-21

## Supporting information

**S1 Fig. Effect of baseline HCV-RNA prevalence and differential duration of scale-up campaign (10, 20 and 30 years).** Based on scale-up of 10 infection per 1000 PWID with a high proportion of cured infection (SVR 90%), a 12-week treatment duration, and no acquired immunity ( $\xi=0$ )

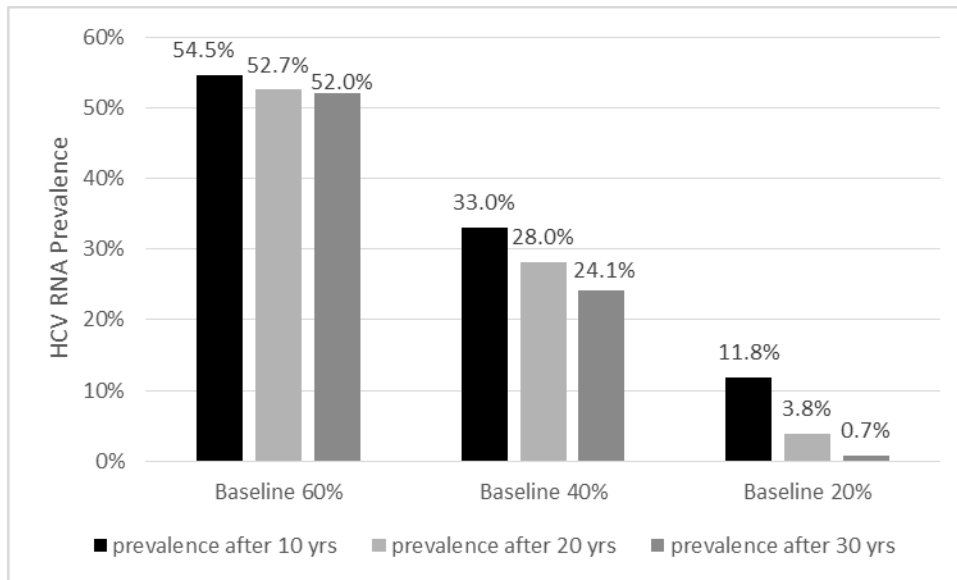

Supplement: pone.0135901.s002.pdf [file pone.0135901.s002.pdf]
