# Supplementary material for: Mathematical Modeling of Hepatitis C Prevalence Reduction with Antiviral Treatment Scale-Up in Persons Who Inject Drugs in Metropolitan Chicago
Source: PubMed Central journal article supplement (PMC4546683; doi:10.1371/journal.pone.0135901), 2015-08-21
Supplement: pone.0135901.s003.pdf [file pone.0135901.s003.pdf]

## Supporting information

**S1 Table. The infection rate needed to sustain baseline prevalences of 20%, 30%, 40%, 50%, and 60% with varying  $\xi$  values.** Based on scale-up of 10 infections per 1000 PWID, 12 week treatment duration, and  $\delta=0.26$ .

| $\xi$ | Infection rate<br>(Prevalence 20%) | Infection rate<br>(Prevalence 30%) | Infection rate<br>(Prevalence 40%) | Infection rate<br>(Prevalence 50%) | Infection rate<br>(Prevalence 60%) |
|-------|------------------------------------|------------------------------------|------------------------------------|------------------------------------|------------------------------------|
| 0.8   | .155                               | .187                               | .236                               | .319                               | .494                               |
| 0.7   | .153                               | .184                               | .229                               | .305                               | .454                               |
| 0.6   | .152                               | .181                               | .223                               | .291                               | .419                               |
| 0.5   | .151                               | .178                               | .217                               | .279                               | .391                               |
| 0.0   | .144                               | .164                               | .192                               | .23                                | .287                               |
