# Supplementary material for: Mathematical Modeling of Hepatitis C Prevalence Reduction with Antiviral Treatment Scale-Up in Persons Who Inject Drugs in Metropolitan Chicago
Source: PubMed Central journal article supplement (PMC4546683; doi:10.1371/journal.pone.0135901), 2015-08-21
Supplement: pone.0135901.s004.pdf [file pone.0135901.s004.pdf]

## Supporting information

**S2 Table. One way sensitivity analysis conducted on the average new injector rate ( $\theta=0$ ) and average PWID leaving rate by cessation or death ( $\mu=\mu$ ) and the effects on scale-up treatment needed to reduce the baseline RNA prevalence by  $\frac{1}{2}$  in 10 years. We maintain  $\theta = 1000 * \mu$  to ensure constant  $N=1000$ .**

|            |                     | Extreme low  |                          |          | Extreme high |                          |          | Cost per PWID population per year |
|------------|---------------------|--------------|--------------------------|----------|--------------|--------------------------|----------|-----------------------------------|
| Population | RNA+ prevalence (%) | Theta/ $\mu$ | Infection rate ( $\pi$ ) | Scale-up | Theta/ $\mu$ | Infection rate ( $\pi$ ) | Scale-up | \$M                               |
| ALL        | 47                  | 50/.05       | .17                      | 31       | 200/0.2      | .68                      | 48       | 49.6-76.8                         |
| HR         | 30                  |              | .11                      | 18       |              | .439                     | 22       | 19.8-24.2                         |
| Young PWID | 10                  |              | .088                     | 5        |              | .353                     | 6        | 2.8-3.3                           |
