# Supplementary material for: Mathematical Modeling of Hepatitis C Prevalence Reduction with Antiviral Treatment Scale-Up in Persons Who Inject Drugs in Metropolitan Chicago
Source: PubMed Central journal article supplement (PMC4546683; doi:10.1371/journal.pone.0135901), 2015-08-21
Supplement: pone.0135901.s006.pdf [file pone.0135901.s006.pdf]

## Supporting information

**S4 Table. One way sensitivity analysis conducted on average proportion of spontaneously cleared infections resulting in immunity ( $\xi$ ) and the effects on scale-up treatment needed to reduce the baseline RNA prevalence by  $\frac{1}{2}$  in 10 years.**

|            |                     | Extreme low |                          |          | Extreme high |                          |          | Cost per PWID population per year |
|------------|---------------------|-------------|--------------------------|----------|--------------|--------------------------|----------|-----------------------------------|
| Population | RNA+ prevalence (%) | ( $\xi$ )   | Infection rate ( $\pi$ ) | Scale-up | ( $\xi$ )    | Infection rate ( $\pi$ ) | Scale-up | \$M                               |
| ALL        | 47                  | 0           | .217                     | 33       | 0.8          | .289                     | 35       | 52.8-56                           |
| HR         | 30                  |             | .164                     | 18       |              | .187                     | 19       | 19.8-20.9                         |
| Young PWID | 10                  |             | .144                     | 5        |              | .15                      | 6        | 2.8-3.3                           |
