# Supplementary material for: Mathematical Modeling of Hepatitis C Prevalence Reduction with Antiviral Treatment Scale-Up in Persons Who Inject Drugs in Metropolitan Chicago
Source: PubMed Central journal article supplement (PMC4546683; doi:10.1371/journal.pone.0135901), 2015-08-21
Supplement: pone.0135901.s007.pdf [file pone.0135901.s007.pdf]

## Supporting information

**S5 Table. One way sensitivity analysis conducted on average proportion of cured infections, due to treatment, resulting in immunity ( $1-\sigma$ ) and the effects on scale-up treatment needed to reduce the baseline RNA prevalence by  $\frac{1}{2}$  in 10 years.**

|            |                     | Extreme low immunity rate |                          |          | Extreme high immunity rate |                          |          | Cost per PWID population per year |
|------------|---------------------|---------------------------|--------------------------|----------|----------------------------|--------------------------|----------|-----------------------------------|
| Population | RNA+ prevalence (%) | ( $1-\sigma=0$ )          | Infection rate ( $\pi$ ) | Scale-up | ( $1-\sigma=.25$ )         | Infection rate ( $\pi$ ) | Scale-up | \$M                               |
| ALL        | 47                  | $\sigma=1$                | .289                     | 35       | $\sigma=0.75$              | .289                     | 33       | 52.8-56                           |
| HR         | 30                  |                           | .187                     | 19       |                            | .187                     | 18       | 19.8-20.9                         |
| Young PWID | 10                  |                           | .15                      | 6        |                            | .15                      | 6        | 3.3                               |
