# Supplementary material for: Mathematical Modeling of Hepatitis C Prevalence Reduction with Antiviral Treatment Scale-Up in Persons Who Inject Drugs in Metropolitan Chicago
Source: PubMed Central journal article supplement (PMC4546683; doi:10.1371/journal.pone.0135901), 2015-08-21
Supplement: pone.0135901.s008.pdf [file pone.0135901.s008.pdf]

## Supporting information

**S6 Table. One way sensitivity analysis conducted on average proportion of cured infections with sustained viral response (SVR) ( $\alpha$ ) and the effects on treatment scale-up needed to reduce the baseline RNA prevalence by  $\frac{1}{2}$  in 10 years.**

|            |                     | Extreme low        |                          |          | Extreme high       |                          |          | Cost per PWID population per year |
|------------|---------------------|--------------------|--------------------------|----------|--------------------|--------------------------|----------|-----------------------------------|
| Population | RNA+ prevalence (%) | Alpha ( $\alpha$ ) | Infection rate ( $\pi$ ) | Scale-up | Alpha ( $\alpha$ ) | Infection rate ( $\pi$ ) | Scale-up | \$M                               |
| ALL        | 47 <sup>C</sup>     | 70%                | .289                     | 44       | 90%                | .289                     | 35       | 56-70.4                           |
| HR         | 30 <sup>C</sup>     |                    | .187                     | 24       |                    | .187                     | 19       | 20.9-26.4                         |
| Young PWID | 10 <sup>D</sup>     |                    | .15                      | 7        |                    | .15                      | 6        | 3.3-3.9                           |
